# Supplementary material for: Investigation of Possible Factors Influencing the Neutralizing Anti-SARS-CoV-2 Antibody Titer after Six Months from the Second Vaccination Dose in a Sample of Italian Nursing Home Personnel
Source: MDPI journal article supplement (doi:10.3390/antib11030059), 2022-09-19
Supplement: s1 [file s1]

# File S1: baseline questionnaire for the study

## “Antibody response after anti-SARS-CoV-2 vaccination in healthcare operators and possible associated factors”

**DATE** [ ][ ]/[ ][ ]/[ ][ ][ ][ ]

Gender ☐ M ☐ F ☐ Other

Date of birth \_\_\_\_\_

Country of birth \_\_\_\_\_

Height \_\_\_\_\_ Weight \_\_\_\_\_

**ANTI-COVID-19 VACCINATION:** ☐ NO ☐ YES

If yes, DATE 1° DOSE [ ][ ]/[ ][ ]/[ ][ ][ ][ ]

If yes, DATE 2° DOSE [ ][ ]/[ ][ ]/[ ][ ][ ][ ]

**TYPE OF ANTI-COVID-19 VACCINE:**

☐ COMIRNATY (Pfizer-BioNtech) ☐ Moderna ☐ Astra-Zeneca

☐ Other: .....

### HEALTH

Are you a current smoker? ☐ NO ☐ YES If yes, since how many years? \_\_\_\_\_ n°  
cigarettes/day \_\_\_\_\_

Do you usually drink alcohol? ☐ NO ☐ YES

If YES, how frequently on a weekly basis do you take 1 o 2 alcoholic units per day? \_\_\_\_\_

☐ only occasionally And how frequently on a weekly basis do you take 3 or more alcoholic units  
per day? \_\_\_\_\_ ☐ only occasionally

*(please note: 1 alcoholic unit is a standard glass of wine – 0.25 l - or a small glass of spirit – 0.10 l -  
or a medium glass of beer – 0.4 l )*

Are you affected by diabetes? ☐ NO ☐ YES

Are you affected by respiratory diseases? ☐ NO ☐ YES

If YES, which disease(s)? \_\_\_\_\_

Are you affected by cardiovascular diseases? ☐ NO ☐ YES

If YES, which disease(s)? ☐ Hypertension ☐ other cardiovascular disease(s) \_\_\_\_\_

\_\_\_\_\_

Are you affected now or were you affected by neoplastic diseases? ☐ **NO** ☐ **YES**

If YES, which disease(s)? \_\_\_\_\_ If yes, when did you undergo the last therapy for this/these disease(s) \_\_\_\_\_

Are you affected by other diseases? ☐ **NO** ☐ **YES**

If YES, which disease(s)? \_\_\_\_\_

Do you usually assume drugs for any of all the disease(s) mentioned above (if any)? ☐ **NO** ☐ **YES**

If YES, which drug(s)? \_\_\_\_\_

In general, during the last year did you take any drug(s) for a long time (at least more than 2 weeks)? ☐ **NO** ☐ **YES**

If YES, which drug(s)? for how long? \_\_\_\_\_

Do you remember your latest vaccination before the anti-COVID-19 one? ☐ **NO** ☐ **YES**

If YES, which vaccination? \_\_\_\_\_ When were you vaccinated? \_\_\_\_\_

Did you experience any of the following symptoms during the last year?

☐ cough ☐ cold ☐ sore throat ☐ tiredness ☐ diffuse joint/muscle pains ☐ slightly increased body temperature (about 37.5-38°C) ☐ highly increased body temperature (>38°C)  
☐ impossibility/difficulty to recognize: ☐ tastes ☐ smells ☐ other symptoms which I believe can be relevant with respect to COVID-19: \_\_\_\_\_

Were you diagnosed with COVID-19 (please note: we mean that you had a confirmed positive diagnostic swab) during the last year? ☐ **NO** ☐ **YES** If YES, do you remember when? (date) \_\_\_\_\_

And when did you get the negative swab and/or you were confirmed as negative for COVID-19? \_\_\_\_\_

Before today, and before the anti-COVID-19 vaccination, did you have at least one serological test to evaluate the presence of anti-SARS-CoV-2 antibodies IgG and/or IgM during the last year?

☐ **NO** ☐ **YES**

If YES, do you remember the latest test you had with a negative result (i.e. with no or insufficient detection of antibodies)? (date) \_\_\_\_\_ ☐ never had a negative serological test

If YES, do you remember the latest test you had with a positive result (i.e. with detection of antibodies)? (date) \_\_\_\_\_ ☐ never had a positive serological test

In case you were diagnosed with COVID-19, was this diagnosis reported to the national workers' compensation authority as a work-related infection? ☐ **NO** ☐ **YES** If YES, do you remember when? (date) \_\_\_\_\_

In case you were diagnosed with COVID-19 and had symptoms, did you had to undergo oxygen support therapy for respiratory fatigue? ☐ **NO** ☐ **YES**

In case you were diagnosed with COVID-19 and had symptoms, were you hospitalized?

☐ **NO** ☐ **YES** If YES, how long have you been to the hospital? \_\_\_\_\_

## **WORK**

JOB TASK \_\_\_\_\_

Does your job include shifts? ☐ **NO** ☐ **YES** If YES, do you perform also night shifts? ☐ **NO** ☐ **YES**

If you perform nightshifts, how many of them did you perform during the last year?

☐ less than 20      ☐ 21-40      ☐ 41-60      ☐ 61-80      ☐ 81-100 or more

Due to your job, did you assist COVID-19 patients during the last year? ☐ **NO**   ☐ **YES**

During the last year, did you follow specific training for the prevention of the COVID-19 risk at work? ☐ **NO**   ☐ **YES**

Due to your job, did you experience any occupational injury at risk for the transmission of an infectious agent (e.g. needle stick injury) during the last year and consequently you had to undergo a profilactic therapy for the prevention of: HIV infection ☐ **NO**   ☐ **YES**   HBV infection ☐ **NO**   ☐ **YES**   TETANUS infection ☐ **NO**   ☐ **YES**

During the last year, how frequently did you use the following Personal Protective Equipment at work:

| DPI                                                         | NEVER | SELDOM | SOMETIMES | OFTEN | ALWAYS |
|-------------------------------------------------------------|-------|--------|-----------|-------|--------|
| Surgical mask                                               |       |        |           |       |        |
| Protective respiratory mask (type FFP2/N95 and/or FFP3/N98) |       |        |           |       |        |
| Disposable gloves (One pair at a time)                      |       |        |           |       |        |
| Disposable gloves (Two pairs at a time)                     |       |        |           |       |        |
| Waterproof overcoat                                         |       |        |           |       |        |
| Overshoes                                                   |       |        |           |       |        |
| Protective glasses                                          |       |        |           |       |        |
| Visor                                                       |       |        |           |       |        |
| Protective headgear                                         |       |        |           |       |        |
| Other 1 (please indicate here _____)                        |       |        |           |       |        |
| Other 2 (please indicate here _____)                        |       |        |           |       |        |

## File S2: follow-up questionnaire for the study "Antibody response after anti-SARS-CoV-2 vaccination in healthcare operators and possible associated factors "

**DATE** [ ][ ]/[ ][ ]/[ ][ ][ ][ ]

Gender    M    F    Other

Date of birth \_\_\_\_\_ Country of birth \_\_\_\_\_

**ANTI-COVID-19 VACCINATION:    NO    YES**

If yes, DATE 1° DOSE [ ][ ]/[ ][ ]/[ ][ ][ ][ ]

If yes, DATE 2° DOSE [ ][ ]/[ ][ ]/[ ][ ][ ][ ]

TYPE OF ANTI-COVID-19 VACCINE:    COMIRNATY (Pfizer-BioNtech)    Moderna    Astra-Zeneca

☐ Johnson & Johnson    ☐ Other: .....

### HEALTH

During the last 6 months (i.e. after our previous investigation and the anti-COVID-19 vaccination) had you any new diagnosis for disease(s) other than COVID-19?    ☐ **NO**    ☐ **YES**

If YES, which disease(s)? \_\_\_\_\_

Did you experience any of the following symptoms during the last 6 months (i.e. after our previous investigation and the anti-COVID-19 vaccination)?    ☐ cough    ☐ cold    ☐ sore throat    ☐ tiredness    ☐ diffuse joint/muscle pains    ☐ slightly increased body temperature (about 37.5-38°C)    ☐ highly increased body temperature (>38°C)    impossibility/difficulty to recognize:    ☐ tastes    ☐ smells    ☐ other symptoms which I believe can be relevant with respect to COVID-19:

Were you diagnosed with COVID-19 (please note: we mean that you had a confirmed positive diagnostic swab) during the last 6 months (i.e. after our previous investigation and the anti-COVID-19 vaccination)?    ☐ **NO**    ☐ **YES**    If YES, do you remember when? (date) \_\_\_\_\_

If YES, can you estimate when, taking as a reference the latest vaccine dose before the infection, were you diagnosed with COVID-19? (please indicate here how many days after the first/second vaccine dose) \_\_\_\_\_

If YES, was the condition you experience with COVID-19 this time a symptomatic one?    ☐ **NO**    ☐ **YES**    If YES, which symptom(s)? \_\_\_\_\_

In case you were diagnosed with COVID-19 during the last 6 months (i.e. after our previous investigation and the anti-COVID-19 vaccination), did you had to undergo oxygen support therapy for respiratory fatigue?    ☐ **NO**    ☐ **YES**

In case you were diagnosed with COVID-19 during the last 6 months (i.e. after our previous investigation and the anti-COVID-19 vaccination), were you hospitalized?  
☐ **NO**    ☐ **YES**    If YES, how long have you been to the hospital? \_\_\_\_\_
